1 **Training load and body composition in adults practicing cyclical exercises**

2

3 Raquel Suelen Brito da Silva<sup>1,3¶</sup>, Marizângela Ferreira de Souza<sup>3¶</sup>, Matheus da Silveira

4 Costa<sup>2,3&</sup>, Gisele Augusta Maciel Franca<sup>4&</sup>, Glêbia Alexa Cardoso<sup>1,3&</sup>, Joane Raquel Estrela

5 Batista<sup>3&</sup>, Carolina Farias Arruda Lopes<sup>3&</sup>, Francisca Karinny Lemos Barbosa<sup>3&</sup>, Alexandre

6 Sérgio Silva<sup>1,2,3¶\*</sup>

7

8 <sup>1</sup> Graduate Associate Program in Physical Education – University of Pernambuco/  
9 Federal University of Paraíba, João Pessoa, Paraíba, Brazil

10

11 <sup>2</sup> Nutritional Science Graduate Program – Federal University of Paraíba, João Pessoa, Paraíba,  
12 Brazil

13

14 <sup>3</sup> Federal University of Paraíba – Federal University of Paraíba, João Pessoa, Paraíba, Brazil

15

16 <sup>4</sup> De Leve Clinic, João Pessoa, Paraíba, Brazil

17

18 \*Corresponding author

19 E-mail: alexandresergiosilva@yahoo.com.br (ASS)

20

21 ¶ These authors contributed equally to this work.

22 & These authors also contributed equally to this work.

23

24 **Abstract**

25

26 Although meta-analyzes point to a weight loss of no more than 3 kg to exercise, body  
27 fat of the athletes are below of the population. Then training load may be a determining factor  
28 in body composition. This study verified if dose of physical training adopted by exercise  
29 practitioners is determinant in body composition. Was a cross-sectional retrospective study

30 carried out with 122 individuals ( $45.8 \pm 13.0$  years, 50 men) who practiced cyclic exercises  
31 (running, walking or cycling) randomly recruited in six regions which the city was  
32 geographically divided. Caloric expenditure was estimated in the trainings based on the  
33 frequency, intensity and duration of the exercises and the body composition was assessed by  
34 electrical bioimpedance. The subjects practiced  $4.3 \pm 1.5$  weekly sessions, with mean duration  
35 of  $56.7 \pm 28.2$  minutes/session and caloric expenditure/day of  $410.2 \pm 384.1$  kcal/day. Linear  
36 regression test revealed a negative correlation ( $p=0.000$ ) between the mean daily expenditure  
37 and all measures of adiposity tested (absolute and relative body fat and visceral fat), and  
38 evidenced that the training load explains 56% of the proposed model. When adjusted for sex,  
39 the correlation remained in men and disappeared in women. Men's with energy expenditure  
40 higher than 785 kcal/day presented lower fat stores than congeners with minor diary training  
41 load. Conclude that training load adopted by physical exercise practitioners is an influencing  
42 factor in the body composition of men, but not of women. Load adopted in conventional  
43 programs training seems insufficient to produce adequate body composition.

44

45 **Key-words:** weight loss, body fat, body composition, caloric expenditure, exercise.

46

## 47 **Introduction**

48 The energy balance between ingestion and caloric expenditure is an important  
49 modulator of body composition [1]. Currently, physical exercise is considered the most  
50 effective way to increase energy expenditure, which depends on the duration, intensity and  
51 weekly frequency of the sessions [2]. However, meta-analytic studies [3,4] and original data  
52 [5,6] have shown very modest results of physical training on weight loss of the no more than

53 3 kg of fat mass after program training of the 3 and 5x / week, with sessions of 45 to 60  
54 minutes.

55 Among some attempts to explain the resistance to exercise-induced weight loss, the  
56 literature reports possible mechanisms that act as a compensatory adaptation of the organism  
57 that includes reduction of basal metabolism in people who perform exercises [7], increased  
58 nutrient intake [8], oxidative stress [9], hyperinsulinemia [10] and genetic profile [11].

59 Despite these compensation mechanisms, athletes present body fat percentage below  
60 of the normal range (11 to 16% for men and 14 to 18% for women) [12, 13]. Considering that  
61 athletes can spend between 2226 a 3877 kcal/day [14-16], it is plausible to assume that a high  
62 training load outweighs the compensation mechanisms that limit weight loss in community  
63 training programs, in which people exercise only 3 to 5 times a week and spend between 400  
64 and 600 Kcal per session [5, 17].

65 Although it seems obvious, this relationship between training load and body  
66 composition is not determined. Previous intervention studies did not adopt different training  
67 loads to verify a possible greater efficacy of the programs with greater dose of exercise.  
68 Similarly, as far as we know, there are no studies that have attempted to answer this question  
69 retrospectively, comparing the energy demand of training loads of athletes and non-athletes  
70 who already practice physical training with their body composition, verifying if people who  
71 take higher loads have lower body fat stock.

72 In order to test this hypothesis, we conducted a retrospective population-based study  
73 with a representative sample of practicing cyclic exercises (running, walking and/or cycling)  
74 of a metropolitan city, which aims at determining the body composition of the subjects and  
75 verifying whether it shows any correlation with the training load adopted in their usual  
76 exercise routine.

77

## 78 **Material and methods**

### 79 **Participants**

80           The sample was selected by conglomerates, considering each of the six districts in  
81 which the city is divided geographically. From each district, two public places used to  
82 practicing physical exercise was randomly selected. The participants should be practicing of  
83 running, walking and/or cycling for at least one year, have a stable training routine over the  
84 weeks (frequency, duration and intensity), have not suffered interruption of the training  
85 routine for more than two weeks in the last three months and not have followed any protocol  
86 (nutritional or pharmacological, for example) intended for weight loss within the past 12  
87 months. In case they performed another exercise modality, this could not exceed 20% of the  
88 weekly training load. Finally, participants could not exceed 200 minutes of moderate physical  
89 activity per week, in addition to the usual physical training.

90

### 91 **Recruitment of participants**

92           Visits were performed during the hours of greater flow of practitioners (5:00 AM to  
93 7:00 AM and 4:00 PM to 7:00 PM) between March 2016 and October 2018. Individuals were  
94 approached 1 in 3 at the time they were practicing physical exercise. Those who met the  
95 inclusion criteria were scheduled for interview and data collection.

96

### 97 **Dietary Profile**

98           The food intake assessment was performed by applying the 24-hour Reminder [18],  
99 performed in duplicate, two days referring to food consumption on weekdays. The values of  
100 the nutrients of the diet were measured and evaluated by a nutritionist, using software  
101 Avanutri version 4.0 (AVANUTRI-RJ, Brazil).

## 102 **Body Composition**

103           Body composition evaluation was performed using the Inbody bioimpedance (model  
104 720, Biospace, Korea). Body weight, fat percentage, fat mass, visceral fat, waist-hip ratio and  
105 skeletal muscle mass were measured. For this evaluation, the volunteers followed some pre-  
106 test procedures: being fasting, not having exercised moderate to high intensity in the 12 hours  
107 before the evaluation, not having consumed alcohol 48 hours before the test, not having  
108 ingested coffee, do not wear metallic jewelry or dental implants with metal during the  
109 evaluation and make use of light clothing during the procedure. Stature was verified by  
110 means of a Sanny® professional stadiometer as recommended by the World Health  
111 Organization/WHO [19]. The body composition and nutritional data were collected at same  
112 week.

113

## 114 **Load Training**

115           The training load was measured based on frequency, duration and speed adopted in  
116 exercises. According information of duration and distance covered by the participants, the  
117 speed of the training sessions was calculated. Those who did not know the exact distance  
118 traveled had a session monitored by means of a GPS. Knowing the modality, distance, speed  
119 and duration of sessions, was adopted the Compendium of Physical Activities proposed by  
120 Ainsworth et al. [20] to estimate the energy expenditure. Data were obtained in kcal by  
121 physical activity adjusted for body weight. The sum of the total caloric expenditure of all  
122 week sessions was divided by seven to adjust caloric expenditure to kcal/day.

123

## 124 **Statistical Analyses**

125 After testing for normality and homogeneity, Pearson's tests and linear regression  
126 were applied to verify the relationship of the caloric expenditure/day on the body  
127 composition, using SPSS Statistics software (v. 24, *IBM SPSS*, Chicago, IL). In addition, the  
128 caloric expenditure in the exercise sessions was divided in terciles and ANOVA one way was  
129 used to compare the body composition of the participants in function of this categorization of  
130 caloric expenditure. Data were presented as mean and standard deviation of the mean or  
131 median and confidence interval (CI) 95%.

132 The study was approved by the Ethics Committee of the Health Sciences Center of the  
133 Federal University of Paraíba (CEP/CCS/UFPB), under protocol no. 0320/15.

134

## 135 **Results**

136 The 122 participants had  $45.8 \pm 13.0$  years. The men ( $n= 50$ ) had body mass index  
137 /BMI of  $26.1 \pm 4.5$  and women ( $n= 72$ ) had  $27.8 \pm 5.7 \text{Kg/m}^2$ . They performed  $4.3 \pm 1.5$   
138 sessions / week ( $56.7 \pm 28.2$  minutes/session). The mean daily caloric expenditure was  $410.2$   
139  $\pm 384.1$  kcal/day. Men obtained  $641.2 \pm 495.6$  kcal/day (minimum and maximum values of  
140  $104.1$  and  $2142.1$  kcal/day; women obtained  $249.8 \pm 135.2$  kcal/day ( $47.0$  to  $653.3$  kcal/day).

141

## 142 **Nutritional Profile**

143 Caloric intake was  $1927.2 \pm 695.8$  kcal/day ( $28.4 \pm 11.6$  kcal/kg of body weight;  $3.6 \pm$   
144  $1.6$  g/kg of carbohydrates,  $1.4 \pm 0.8$  g/kg of proteins and  $0.8 \pm 0.4$  g/kg of fats. When stratified  
145 by gender, the caloric intake was  $2327.7 \pm 735.4$  kcal/day ( $32.9 \pm 13.2$  kcal/kg) for men and  
146  $1649.0 \pm 510.3$  kcal/day ( $25.2 \pm 9.2$  Kcal/kg) for women. Men and women presented  $4.1 \pm 1.9$   
147 and  $3.3 \pm 1.4$  g/kg of carbohydrates,  $1.7 \pm 0.9$  and  $1.2 \pm 0.6$  g/kg of proteins, and  $0.9 \pm 0.5$  and  
148  $0.7 \pm 0.4$  g/kg of fats, respectively.

## 149 **Food intake and body composition**

150 Correlation tests ruled out the possibility that higher caloric intake, carbohydrate and  
151 dietary fats would account for the greater body fat composition. On the contrary, it was  
152 observed that higher caloric intake had a significant, however weak negative inverse  
153 correlation with fat percentage ( $p = 0.00$ ,  $R = -0.52$ ) and absolute body fat weight ( $p = 0.00$ ;  
154  $R = -0.38$ ). This same behavior happened when analyzes were performed for carbohydrate  
155 and fat intake, and in these cases, negative and weak correlations were also found for BMI  
156 and visceral fat. Was showed a positive and moderate correlation between caloric intake and  
157 daily caloric expenditure with exercise ( $p = 0.00$ ,  $R = 0.53$ ), with this same behavior being  
158 maintained for carbohydrate and fat intake.

159

## 160 **Training load, body composition and energy expenditure**

161 The data presented in Table 1 confirm the hypothesis that the training load is an  
162 influencing factor on the body composition. There was a negative association between daily  
163 caloric expenditure in physical exercises and all measures of body composition related to  
164 adiposity. However, when the analysis was categorized by sex, it was observed that the  
165 correlation was maintained in men, and disappeared for all variables in women.

166

167

168 **Table 1. Relationship between mean caloric expenditure per session and body**  
 169 **composition of participants in the general population and stratified by sex.**

| Variables                            | General<br>(47.0 - 2142.1<br>kcal/day)<br>n= 122 |        | Men<br>(104.1 – 2142.1<br>kcal/day)<br>n= 50 |        | Women<br>(47.0 – 653.3<br>kcal/day)<br>n= 72 |       |
|--------------------------------------|--------------------------------------------------|--------|----------------------------------------------|--------|----------------------------------------------|-------|
|                                      | Mean                                             | R      | Mean                                         | R      | Mean                                         | R     |
| <b>Weight (kg)</b>                   | 71.6 ± 14.5                                      | 0.24   | 75.7 ± 14.5                                  | -0.25  | 68.8 ± 13.9                                  | 0.17  |
| <b>BMI (Kg/m<sup>2</sup>)</b>        | 27.1 ± 5.3                                       | -0.21* | 26.1 ± 4.5                                   | -0.32* | 27.8 ± 5.7                                   | 0.08  |
| <b>Body fat (%)</b>                  | 31.7 ± 10.9                                      | -0.56* | 23.2 ± 9.0                                   | -0.49* | 37.6 ± 7.9                                   | -0.17 |
| <b>Body fat (kg)</b>                 | 23.3 ± 10.9                                      | -0.37* | 18.4 ± 9.7                                   | -0.41* | 26.6 ± 10.5                                  | 0.04  |
| <b>WHR (cm)</b>                      | 0.90 ± 0.1                                       | -0.32* | 0.88 ± 0.1                                   | -0.37* | 0.91 ± 0.1                                   | -0.05 |
| <b>Visceral fat (cm<sup>2</sup>)</b> | 90.4 ± 36.7                                      | -0.42* | 75.9 ± 41.9                                  | -0.43* | 100.6 ± 28.8                                 | 0.04  |
| <b>SMM (kg)</b>                      | 26.7 ± 6.1                                       | 0.45*  | 32.2 ± 4.8                                   | 0.07   | 22.9 ± 3.2                                   | 0.38* |

170 Date: Between brackets below the general and stratified population are the minimum and maximum values of the  
 171 caloric expenditure per day normalized by seven days week. Other data are mean and standard deviation of the  
 172 mean. CE: caloric expenditure; BMI: body mass index; WHR: waist-hip ratio; SMM: skeletal muscle mass. \*:   
 173 p<0.05; (Pearson Test)

174

175 Considering that the association was only found in men, a regression analysis was  
 176 carried out only for this population, taking the fat percentage as dependent variable and the  
 177 caloric expenditure/day as independent variable. This model confirmed that the caloric  
 178 expenditure significantly influenced the fat percentage (p<0.00). The standardized beta  
 179 coefficient indicated that caloric expenditure accounts for 56% of this variable among men.

180 Finally, the sample was divided into terciles (Table 2). It was verified that the  
 181 subgroup of men in the upper tercile (>785 Kcal/day) presented the variables related to body  
 182 fat significantly lower in relation to those in the lower tercile (caloric expenditure less than  
 183 398 kcal/day). Subjects in the middle tercile (between 398 and 785 kcal) were not  
 184 significantly leaner than those in the first, nor in the third tercile. For women, the tercile  
 185 distribution did not show differences between those with the lowest and the highest caloric  
 186 expenditures per day.



187 **Table 2. Body composition profile according to the caloric expenditure (in terciles).**

|                                      | General                                |                                       |                                        | Men                                    |                                       |                                        | Women                                  |                                       |                                        |
|--------------------------------------|----------------------------------------|---------------------------------------|----------------------------------------|----------------------------------------|---------------------------------------|----------------------------------------|----------------------------------------|---------------------------------------|----------------------------------------|
| <b>CE/day (kcal/d)</b>               | <b>1st tercile (&lt; 247)<br/>n=51</b> | <b>2nd tercile (247-453)<br/>n=36</b> | <b>3rd tercile (&gt; 453)<br/>n=35</b> | <b>1st tercile (&lt; 398)<br/>n=19</b> | <b>2nd tercile (398-785)<br/>n=19</b> | <b>3rd tercile (&gt; 785)<br/>n=12</b> | <b>1st tercile (&lt; 188)<br/>n=27</b> | <b>2nd tercile (188-273)<br/>n=20</b> | <b>3rd tercile (&gt; 273)<br/>n=25</b> |
| <b>Weight (kg)</b>                   | 68.8±12.2                              | 74.2±15.6                             | 73.1±15.9                              | 79.1±14.0                              | 75.2±15.4                             | 70.9±13.3                              | 65.6±9.9                               | 66.2±12.0                             | 73.8±17.6                              |
| <b>BMI (Kg/m<sup>2</sup>)</b>        | 27.3±4.4                               | 28.2±6.0                              | 25.7±5.5                               | 27.5±4.7                               | 25.9±4.3                              | 24.2±4.4                               | 27.1±4.4                               | 26.9±4.8                              | 29.3±7.3                               |
| <b>Body fat (%)</b>                  | 36.7±7.3                               | 33.6±10.0                             | 22.5±10.8*#                            | 28.0±7.8                               | 22.2±7.6                              | 17.3±9.5*                              | 39.2±6.5                               | 35.4±8.8                              | 37.7±8.3                               |
| <b>Body fat (kg)</b>                 | 25.6±8.0                               | 25.6±11.5                             | 17.4±12.0*#                            | 22.7±9.1                               | 17.4±8.9                              | 13.2±9.6*                              | 26.2±7.5                               | 24.1±9.3                              | 29.1±13.6                              |
| <b>WHR (cm)</b>                      | 0.92±0.06                              | 0.91±0.07                             | 0.87±0.1*#                             | 0.92±0.1                               | 0.89±0.1                              | 0.84±0.1*                              | 0.91±0.1                               | 0.91±0.1                              | 0.91±0.1                               |
| <b>Visceral fat (cm<sup>2</sup>)</b> | 100.1±26.7                             | 97.5±36.4                             | 68.3±41.5*#                            | 93.9±36.9                              | 73.4±39.5                             | 51.4±42.5*                             | 100.3±22.2                             | 93.4±32.4                             | 106.9±31.9                             |
| <b>SMM (kg)</b>                      | 23.6±4.6                               | 26.8±5.8*                             | 31.2±5.4*#                             | 31.7±5.2                               | 32.5±5.0                              | 32.7±4.3                               | 21.4±2.9                               | 23.0±3.2                              | 24.4±2.8*                              |

Data are mean ±SD. Mean values are caloric expenditure per session normalized by seven days week; CE: caloric expenditure; BMI: body mass index; WHR: waist-hip ratio; SMM: skeletal muscle mass. \* = difference from the first tercile; # = difference from the second tercile (one way ANOVA).

## Discussion

This study showed that men who spend higher calories in physical training have lower levels of body fat. The data obtained with women do not allow the same conclusion because this population has a small variability in caloric expenditure - while men's energy expenditure varied from 104.1 to 2142.1 kcal/day, among women this range was only from 47.0 to 653.3kcal/day.

Compensatory adaptation to exercise has been pointed out as one of the explanations for limited weight loss found in prospective interventions studies [7] which some authors call of adaptive thermogenesis [21]. It is still suggested that oxidative stress, systemic inflammation explain this phenomenon [8]. Although physiological factors may explain exercise limitations to promote weight loss, the workout load is a factor that should not be disregarded, because empirical observation indicating that athletes present low fat stores. Although this relationship between training load and body composition seems obvious, at least as far as we know, this subject has been little explored.

The importance of considering this theme is that the limited ability of physical training to lose weight may simply be because the training load of 3 to 5 weekly sessions adopted in previous intervention studies may not be sufficient to provide clinically important weight loss. The studies of Li et al. [22] and Thomas et al. [23] correspond to the review studies that verified the relationship between training load and weight loss in intervention studies. However are based on studies with distinct populations and small sample sizes, which greatly limits these conclusions.

To investigate the participation of the training load, the studies can be designed methodologically in two ways, one of them with intervention studies with various training loads, to test a possible greater effectiveness of these loads in the loss of body fat. However, the difficulty in developing this type of study concerns the application of interventions in

large populations involving various training loads for comparison purposes, which makes their viability quite difficult. Another possibility would be retrospective cross-sectional studies, verifying how people already submitted to various loads of training presents in terms of body composition. This second option is more practical and brings preliminary results that justify (or not) investment in intervention studies.

In addition to providing data from a systematic observation indicating that training load is a determinant factor in body composition, our data provide clues as to what would be the minimum daily training load to have adequate body fat stores. When the energy expenditure in the training was divided into terciles, our findings showed that only men's that consumed more than 785 kcal / day presented significantly lower levels of body fat compared to those who had lower average daily training load. The demand is higher than that proposed by the American College of Sport Medicine [24], which indicates an energy expenditure of 300 kcal / day for reduction of total body mass and fat mass. Moreover, this is a training protocol far superior to the intervention studies that adopt 5 weekly sessions, with caloric expenditure of 400 –600 kcal/session [5, 17, 25], which adjusted for the seven days of the week, results in only 285.1 and 428.6 kcal/day, respectively.

Regression analysis showed statistically significant correlation between training load and fat stores, but also that the daily workout load represented 56% of the statistical model, which clearly indicates that, despite having the training load as an influencing factor among men, other factors are involved in the body composition response to physical training. In fact, this evidence is not surprising, since the literature has shown that several physiological [8], genetic [11] and behavioral [26] factors participate in the body composition.

Another important issue is that, among women, the training load was not a factor that influences in the body composition. One possible cause for such a finding is that women respond much less to training [22], as shown in several studies [5, 27, 28]. Another possible

explanation is that the range of energy expenditure among women was very small, with maximum value of 653.3 kcal/day, while men burned 2142.1 kcal/day. An increase in the sample size, which is actually occurring in our study, can modify this scenario, as women who train with a higher caloric expenditure may appear in random sampling. Therefore, our data do not still allow us to determine whether the absence of correlation for women is due to physiological factors or to the training load.

Cross section studies have obvious limitations compared to prospective interventions. A single measurement of the variables was carried out, which makes us propose that future studies be done longitudinally to follow variations in these variables. Moreover, we consider only the energy expenditure in the training, being that the body has energy expenditure with other types of physical activities. Although we have adopted energy expenditure with other physical activities above 200 minutes of moderate physical activity per week as exclusion criterion, this daily energy demand, although small, can participate in the total energy balance, so we intend to consider it in future studies.

In terms of practical implication, we highlight the possibility that training programs aimed to weight loss in men should have the training loads reviewed. The main indication obtained from this study is that training programs with 3 to 5 sessions per week, with energy levels in the 200-300 kcal/week [29] may not be enough for those who need to obtain weight loss clinically important.

According to our data, men need to train seven times a week, spending 785 kcal in each session (equivalent to about 60 minutes with moderate to high intensity) to have adequate fat stores. Therefore, they are data that can modify the current paradigm regarding the relationship exercise and weight loss.

## References

1. Mihalache L, Gherasim A, Nita O, Ungureanu MC, Padureanu SS, Gavril RS, et al. Effects of ghrelin in energy balance and body weight homeostasis. *Hormones*. 2016; 15(2): 186-196.
2. Aadland E, Jepsen R, Andersen JR, Anderssen SA. Differences in fat loss in response to physical activity among severely obese men and women. *J Rehabil Med*. 2014; 46(4): 363-369.
3. Johns DJ, Hartmann-Boyce J, Jebb SA, Aveyard P. Diet or exercise interventions vs combined behavioral weight management programs: a systematic review and meta-analysis of direct comparisons. *J Acad Nutr Diet*. 2014; 114(10): 1557-1568.
4. Washburn RA, Szabo AN, Lambourne K, Willis EA, Ptomey LT, Honas J, et al Does the method of weight loss effect long-term changes in weight, body composition or chronic disease risk factors in overweight or obese adults? A systematic review. *PLoS One*. 2014; 9(10): e109849.
5. Donnelly JE, Honas JJ, Smith BK., Mayo MS, Gibson CA, Sullivan DK, et al. Aerobic exercise alone results in clinically significant weight loss for men and women: Midwest Exercise trial-2. *Obesity (Silver Spring)*. 2013; 21(3): E219-E228.
6. Lakdhar N, Denguezli M, Zaouali M, Zbidi A, Tabka Z, Bouassida A. Six months training alone or combined with diet alters HOMA-AD, HOMA-IR and plasma and adipose tissue adiponectin in obese women. *Neuro Endocrinol Lett*. 2014; 35(5): 373-379.
7. Pontzer H, Durazo-Arvizu R, Dugas LR, Plange-Rhule J, Bovet P, Forrester TE, et al. Constrained total energy expenditure and metabolic adaptation to physical activity in adult humans. *Curr Biol*. 2016; 26(3): 410-417.
8. Boutcher SH, Dunn SL. Factors that may impede the weight loss response to exercise-based interventions. *Obes Rev*. 2009; 10(6): 671-680.

9. Zambon A, Pauletto P, Crepaldi G. Review article: the metabolic syndrome – a chronic cardiovascular inflammatory condition. *Aliment Pharmacol Ther.* 2005; 22(Suppl.2): 20–23.
10. Templeman NM, Skovso S, Page MM, Lim GE, Jonhson JD. A causal role for hyperinsulinemia in obesity. *J Endocrinol.* 2017; 232(3): R173-R183.
11. Luglio HF, Sulistyoningrum DC, Susilowati R. The role of genes involved in lipolysis on weight loss program in overweight and obese individuals. *J Clin Biochem Nutr.* 2015; 57(2): 91-97.
12. Hagmar M., Berglund B, Brismar K, Hirschberg AL. Body composition and endocrine profile of male Olympic athletes striving for leanness. *Clin J Sport Med.* 2013; 23(3):197–201.
13. Mala L, Maly T, Zahalka F, Bunc V, Kaplan A, Jebavy R, et al. Body composition of elite female players in five different sports games. *J Human Kinet.* 2015; 45: 207-215.
14. Ong JL, Bronwlee IA. Energy expenditure, availability, and dietary intake assessment in competitive female dragon boat athletes. *Sports.* 2017; 5(2): E45.
15. Heydenreich J, Kayser B, Schutz Y, Melzer K. Total energy expenditure, energy intake, and body composition in endurance athletes across the training season: a systematic review. *Sports Med.* 2017; 3(8): 2-24.
16. Wierniuk A, Wlodarek D. Assessment of physical activity, energy expenditure and energy intakes of young men practicing aerobic sports. *Rocz Panstw Zakl Hig.* 2014; 65(4): 353-357.
17. Donnelly JE, Hill JO, Jacobsen DJ, Potteiger J, Sullivan DK, Johnson SL, et al. Effects of a 16- month randomized controlled exercise trial on body weight and composition in young, overweight men and women. *Arch Intern Med.* 2003; 163: 1343-1350.

18. Gibson RS. Principles of nutritional assessment. New York: Oxford University Press; 1990.
19. World Health Organization. Waist circumference and waist-hip ratio. Geneva: WHO; 2008. Available from:  
[http://apps.who.int/iris/bitstream/handle/10665/44583/9789241501491\\_eng.pdf;jsessionid=E936D4DF3E76920CC1524A7EEAE62B90?sequence=1](http://apps.who.int/iris/bitstream/handle/10665/44583/9789241501491_eng.pdf;jsessionid=E936D4DF3E76920CC1524A7EEAE62B90?sequence=1).
20. Ainsworth BE, Haskell WL, Whitt MC, Irwin ML, Swartz AM, Strath SJ, et al. Compendium of physical activities: an update of activity codes and MET intensities. *Med Sci Sports Exerc.* 2000; 32(9): S498-S504.
21. Tremblay A, Royer MM, Chaput JP, Doucet É. Adaptive thermogenesis can make a difference in the ability of obese individuals to lose body weight. *Int J Obes.* 2013; 37(6): 759–64.
22. Li J, O'Connor LE, Zhou J, Campbell WW. Exercise patterns, ingestive behaviors, and energy balance. *Physiol Behav.* 2014; 134: 70-75.
23. Thomas DM, Bouchard C, Church T, Slentz C, Kraus WE, Redman LM, et al. Why do individuals not lose more weight from an exercise intervention at a defined dose? An energy balance analysis. *Obes Rev.* 2012; 13(10): 835-847.
24. American College of Sports Medicine. A quantidade e o tipo recomendados de exercícios para o desenvolvimento e a manutenção da aptidão cardiorrespiratória e muscular em adultos saudáveis. *Rev Bras Med Esporte.* 1998; 4(3): 96-106.
25. Hopkins M, Gibbons C, Caudwell P, Webb D, Hellström PM, Näslund E, et al. Fasting leptin is a metabolic determinant of food reward in overweight and obese individuals during chronic aerobic exercise training. *Int J Endocrinol.* 2014; 2014: 1-8.

26. King NA, Caudwell P, Hopkins M, Byrne NM, Colley R, Hills AP, et al. Metabolic and behavioral compensatory responses to exercise interventions: barriers to weight loss. *Obesity (Silver Spring)*. 2007; 15(6): 1373–1383.
27. Kirchengast S. Gender differences in body composition from childhood to old age: an evolutionary point of view. *JLS*. 2010; 2(1): 1-10.
28. Bredella MA. Sex differences in body composition. *Adv Exp Med Biol*. 2017; 1043: 9-27.
29. Donnelly JE, Blair SN, Jakicic JM, Manore MM, Rankin JW, Smith BK, et al. American College of Sports Medicine Position Stand. Appropriate physical activity intervention strategies for weight loss and prevention of weight regain for adults. *Med Sci Sports Exerc*. 2009; 41(2): 459-471.
